# Supplementary material
Source: PubMed Central journal article supplement (PMC363056)

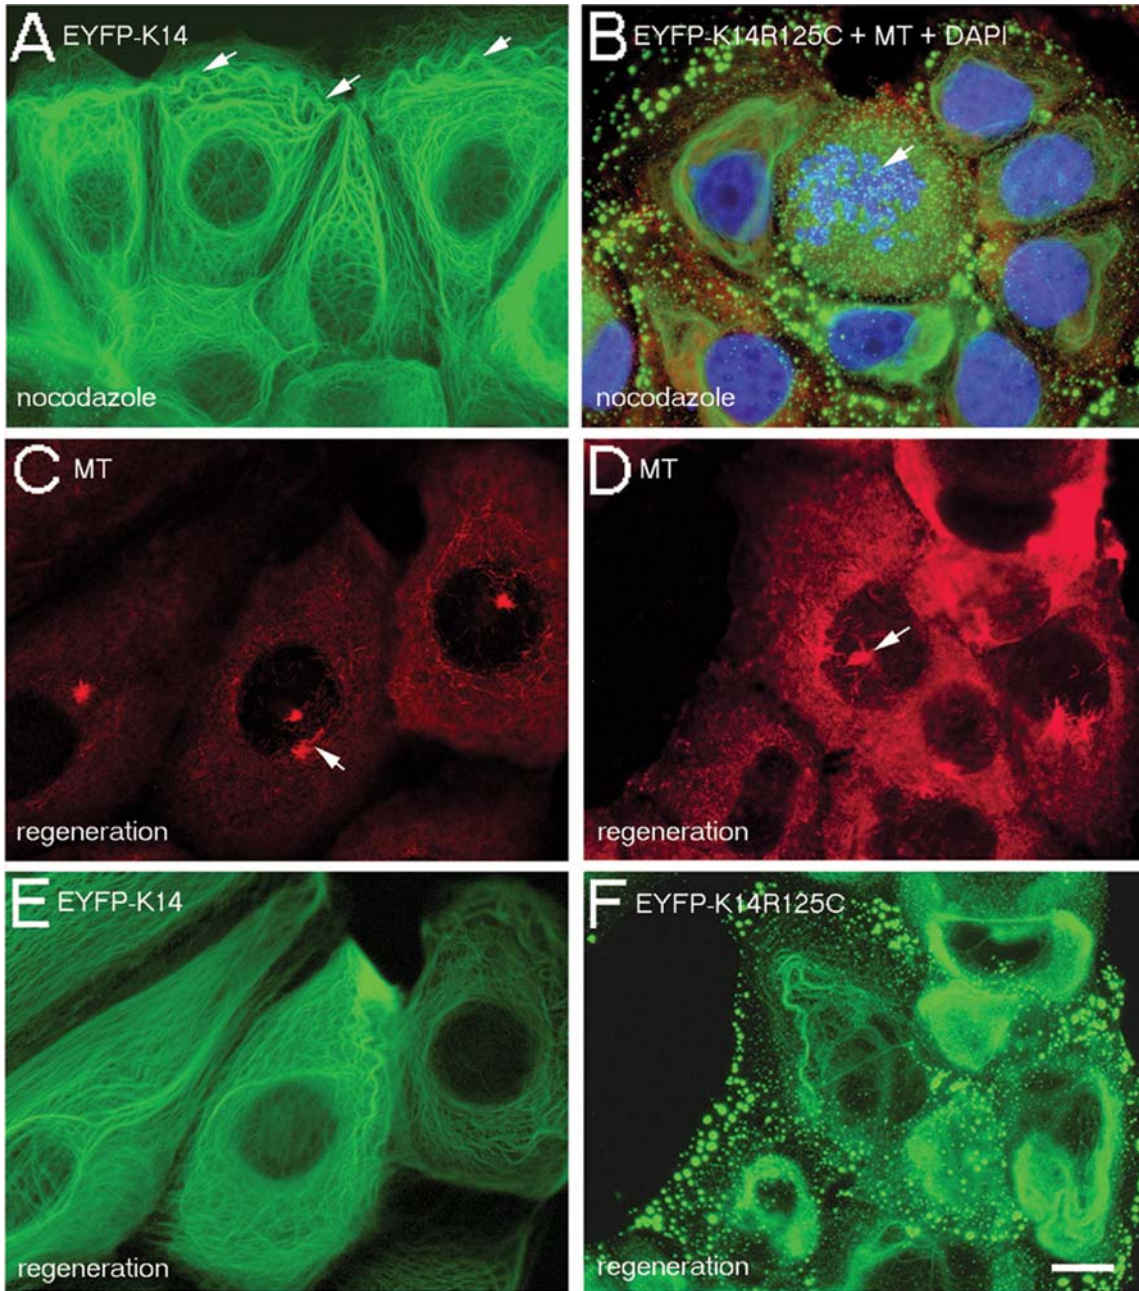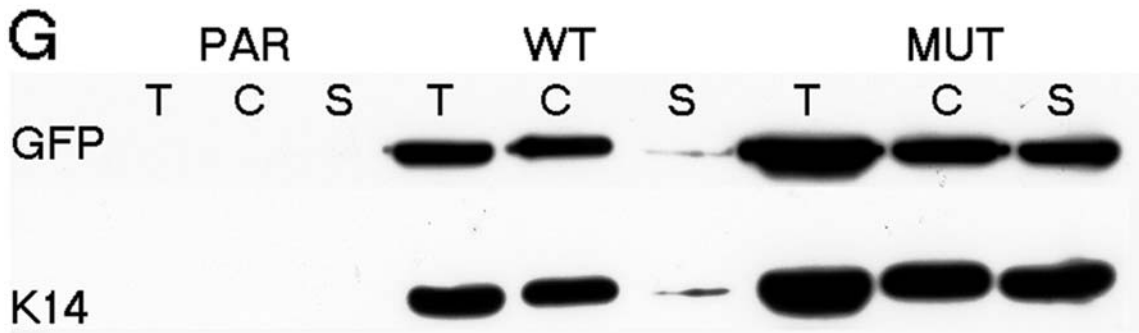

Supplement: mbc_15_3_990__1.pdf [file mbc_15_3_990__1.pdf]
